# Supplementary material for: Proteomic analysis of sera of asymptomatic, early-stage patients with Wilson's disease
Source: PubMed Central journal article supplement (PMC2883077; doi:10.1002/prca.200800057), 2009-10

# PROTEOMICS

**Supporting Information  
for Proteomics Clin. Appl.  
DOI 10.1002/prca.200800057**

Jung-Young Park, Joo Hee Mun, Beom Hee Lee, Sun Hee Heo,  
Gu-Hwan Kim and Han-Wook Yoo

**Proteomic analysis of sera of asymptomatic, early-stage patients with Wilson's  
disease**

### Complement component C3

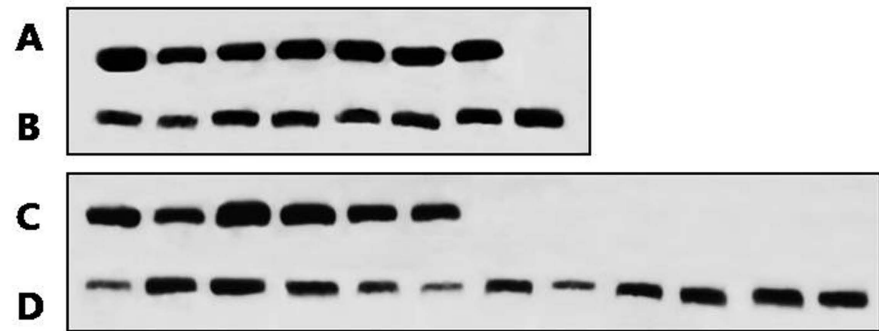

### Complement factor B

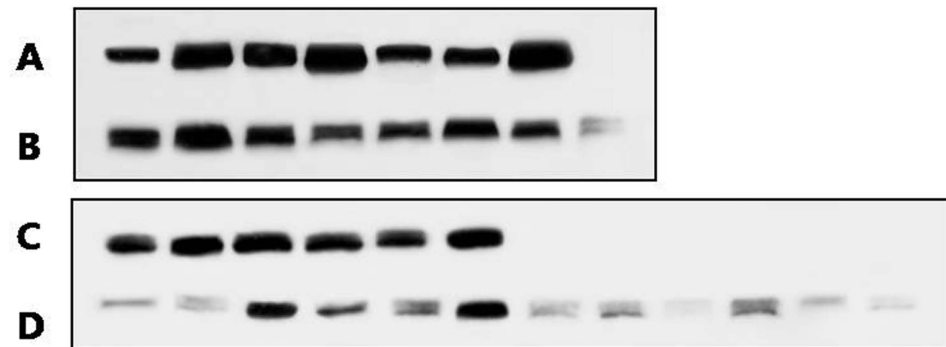

### Alpha 2 Macroglobulin

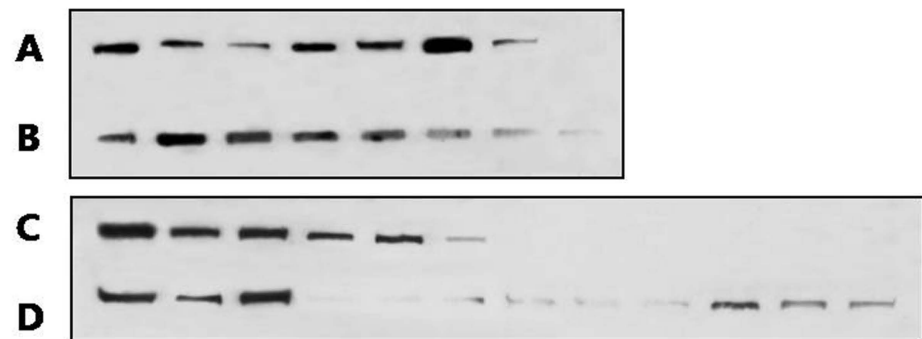

### GAPDH

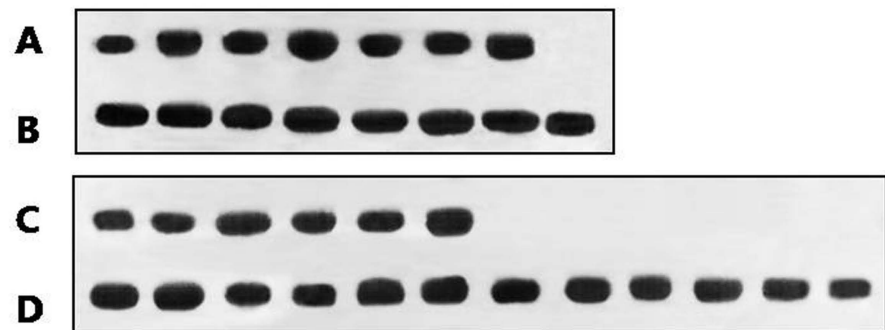

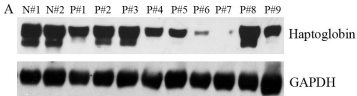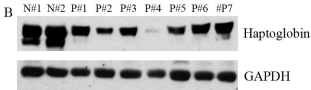

Supplement: prca0003-1185-SD1.pdf [file prca0003-1185-SD1.pdf]
